# Supplementary material for: Metagenomic Predictions: From Microbiome to Complex Health and Environmental Phenotypes in Humans and Cattle
Source: PubMed Central journal article supplement (PMC3762846; doi:10.1371/journal.pone.0073056), 2013-09-04
Supplement: pone.0073056.s001.pdf [file pone.0073056.s001.pdf]

## File S1.

# Metagenomic Predictions: from microbiome to complex health and environmental phenotypes in humans and cattle

E.M. Ross<sup>a,b,c,\*</sup>, P.J. Moate<sup>d</sup>, L. Marett<sup>d</sup>, B.G. Cocks<sup>a,b,c</sup>, B.J. Hayes<sup>a,b,c</sup>

<sup>a</sup> Biosciences Research Division, Department of Environment and Primary Industries, Bundoora, VIC 3083, Australia

<sup>b</sup> Dairy Futures Cooperative Research Centre, Bundoora, VIC, Australia

<sup>c</sup> La Trobe University, Bundoora, VIC, Australia

<sup>d</sup> Future Farming Systems Division, Department of Environment and Primary Industries, Ellinbank, VIC, Australia

\*Corresponding Author: elizabeth.ross@depi.vic.gov.au

**Key words:** Metagenome, microbiome, prediction, rumen, methane, BLUP

This document contains supporting material including:

- Instructions for running metagenomic predictions
- Calculations for the estimate of the number of cells in the bovine rumen
- Table S1
- Table S2
- Table S3
- Figure S1
- Figure S2
- Figure S3
- Figure S4
- Figure S5

## Running Metagenomic Predictions

A script which converts a metagenomic profile matrix and phenotypes to files that can be run as ASReml [1] has been supplied. As ASReml is not a free product we have also implemented the method using the free R package rrBLUP [2]. Both scripts and some small example data are supplied in File S2 .

The provided scripts were designed for a linux operating system. All systems are administered differentially and you should contact you system administrator to ensure you have access to the required files and programs.

The script is coded in the R statistical language [3], which is free software available for many platforms. The script requires a space delimited count matrix (Figure S1a), and a space delimited phenotype table (Figure S1b) which contains the reference populations phenotypes. The sample names in the count matrix must match exactly with the sample names used in the phenotype table. The rrBLUP script requires a third variable, which is the name of the file which the output will be put in (e.g. Output.txt).

Once R is installed, the scripts can be opened and run one line at a time, or they can be run using a command.

To run the rrBLUP version, which is called MetagenomicPredictions.R, place the script in the current working directory. Then run one of:

1. `Rscript MetagenomicPredictions.R MPM.txt Phenotypes.txt Outfile.txt`
2. `R CMD BATCH --slave "--args MPM.txt Phenotypes.txt Outfile.txt" MetagenomicPredictions.R`

To run the ASReml version, which is called MetagenomicPredictionForASReml.R, place the script in the current working directory. Then run one of:

1. `Rscript MetagenomicPredictionForASReml.R MPM.txt Phenotypes.txt`
2. `R CMD BATCH --slave "--args MPM.txt Phenotypes.txt" MetagenomicPredictionForASReml.R`

In this example MPM.txt contains a metagenomic profile matrix, Phenotypes.txt contains the phenotype table. In the rrBLUP version, the predictions will be placed in a new file with the name specified in the third variable (in the example given that is Outfile.txt). In the ASReml version four output files are made (.as, .phen, .giv and a sample name key). These files are named using the original file names plus an extension. The .as file can then be used to run ASReml if it is installed on the system.

Note that in the example files given the MetagenomicPredictionForASReml.R script has difficulty solving the relationship matrix. To deal with this situation the script tries adding 0.1 to the diagonal of the matrix. If this fails it adds a further +1 to the diagonal of the matrix. If the matrix can still not be solved the script exits.

## Bacterial Cells in the Bovine Rumen

This is a calculation based on the reported number of bacteria per mL of rumen fluid [4] and adhered to the plant material and the rumen volume, compared to the average cell weight[5] versus the average cow weight. The average weight of total rumen contents from eight lactating Holstein cows was 106Kg (calculated by removing the total rumen contents through a fistula). The average empty cow weight of the same animals was 521Kg. We used an estimate that the rumen contained 77% rumen fluid (81.6L) by weight [6]. Studies have suggested that 70% of rumen microbes are adhered to the fibre component of rumen contents [7]. Based on these numbers we have tried to estimate the number of bacterial cells in the bovine rumen as compared to the animals own mammalian cells.

Based on cells in the rumen fluid:

$(10^{11} \text{ bacterial cells/mL} \times 81,600 \text{ mL}) / (521,000,000,000,000 \text{ ng} \div 2.3 \text{ ng/mammalian cell}) =$   
 $8.16 \times 10^{15} \text{ bacterial cells} / 2.27 \times 10^{14} \text{ mammalian cells} =$   
35.94 times more bacterial cells than bovine cells in rumen fluid only.

Only 30% of rumen microbes are in the fluid, 70% are firmly attached to the fibre component [7].

Therefore:

$8.16 \times 10^{15} \text{ bacterial cells in fluid} + 1.90 \times 10^{16} \text{ bacterial cells in fibre fraction} = 2.72 \times 10^{16} \text{ bacterial cells}$   
 $2.72 \times 10^{16} \text{ bacterial cells} / 2.27 \times 10^{14} \text{ mammalian cells} =$   
119.8 times more bacterial cells than bovine cells in the bovine rumen

Alternatively, if a 70kg human has  $10^{13}$  cells [8], a 521kg cow should have  $7.44 \times 10^{13}$  cells (assuming the same cell density per Kg). Therefore:

$2.72 \times 10^{16} \text{ bacterial cells} / 7.44 \times 10^{13} \text{ mammalian cells} =$   
365.6 times more bacterial cells than bovine cells

These values are very speculative and should be treated with caution. Without bacterial counts per mL or per gram from the same animals that were weighted it is not possible to get an accurate account of the number of bacterial cells in the rumen. Additionally there is no accurate way to access the number of cells in the host animals. Because of this we report the lower of the two whole rumen microbe estimates in the body of the paper. A more though estimate may include microbes in other sections of the gastrointestinal tract, as well as other body sites such as skin.

Table S1. Rumen sample phenotypes.

| Cow ID | Group  | Diet                           | CH <sub>4</sub> measurement technique | RF Collection | CH <sub>4</sub> g/kgDMI <sup>†</sup> |
|--------|--------|--------------------------------|---------------------------------------|---------------|--------------------------------------|
| 2202   | bovFT  | Con <sub>FT</sub> <sup>#</sup> | Chamber                               | Fistulae      | 22.46                                |
| 2202   | bovFT  | FT                             | Chamber                               | Fistulae      | 20.37                                |
| 3063   | bovFT  | FT                             | Chamber                               | Fistulae      | 21.81                                |
| 3063   | bovFT  | Con <sub>FT</sub> <sup>#</sup> | Chamber                               | Fistulae      | 22.07                                |
| 6803   | bovFT  | FT                             | Chamber                               | Fistulae      | 19.75                                |
| 6803   | bovFT  | Con <sub>FT</sub> <sup>#</sup> | Chamber                               | Fistulae      | 21.59                                |
| 6838   | bovFT  | FT                             | Chamber                               | Fistulae      | 19.52                                |
| 6852   | bovFT  | Con <sub>FT</sub> <sup>#</sup> | Chamber                               | Fistulae      | 19.01                                |
| 6852   | bovFT  | FT                             | Chamber                               | Fistulae      | 18.40                                |
| 6859   | bovFT  | Con <sub>FT</sub> <sup>#</sup> | Chamber                               | Fistulae      | 21.99                                |
| 6859   | bovFT  | FT                             | Chamber                               | Fistulae      | 21.25                                |
| 6882   | bovFT  | Con <sub>FT</sub> <sup>#</sup> | Chamber                               | Fistulae      | 22.88                                |
| 6882   | bovFT  | FT <sub>a</sub>                | Chamber                               | Fistulae      | 20.23                                |
| 6882   | bovFT  | FT <sub>b</sub>                | Chamber                               | Fistulae      | 20.23                                |
| 7920   | bovFT  | Con <sub>FT</sub> <sup>#</sup> | Chamber                               | Fistulae      | 21.51                                |
| 7920   | bovFT  | FT                             | Chamber                               | Fistulae      | 20.98                                |
| 1995   | bovGMC | Con <sub>G</sub>               | SF <sub>6</sub>                       | Stomach Pump  | 26.67                                |
| 2028   | bovGMC | Con <sub>G</sub>               | SF <sub>6</sub>                       | Stomach Pump  | 25.37                                |
| 2165   | bovGMC | Con <sub>G</sub>               | SF <sub>6</sub>                       | Stomach Pump  | 25.68                                |
| 3060   | bovGMC | Con <sub>G</sub>               | SF <sub>6</sub>                       | Stomach Pump  | 24.25                                |
| 4570   | bovGMC | Con <sub>G</sub>               | SF <sub>6</sub>                       | Stomach Pump  | 26.25                                |
| 5679   | bovGMC | Con <sub>G</sub>               | SF <sub>6</sub>                       | Stomach Pump  | 27.32                                |
| 657    | bovGMC | Con <sub>G</sub>               | SF <sub>6</sub>                       | Stomach Pump  | 25.61                                |
| 6833   | bovGMC | Con <sub>G</sub>               | SF <sub>6</sub>                       | Stomach Pump  | 25.45                                |
| 6857   | bovGMC | Con <sub>G</sub>               | SF <sub>6</sub>                       | Stomach Pump  | 25.96                                |
| 6870   | bovGMC | Con <sub>G</sub>               | SF <sub>6</sub>                       | Stomach Pump  | 23.69                                |
| 7939   | bovGMC | Con <sub>G</sub>               | SF <sub>6</sub>                       | Stomach Pump  | 27.01                                |
| 1990   | bovGMC | Dry <sub>G</sub>               | SF <sub>6</sub>                       | Stomach Pump  | 21.48                                |
| 2196   | bovGMC | Dry <sub>G</sub>               | SF <sub>6</sub>                       | Stomach Pump  | 19.97                                |
| 2204   | bovGMC | Dry <sub>G</sub>               | SF <sub>6</sub>                       | Stomach Pump  | 18.75                                |
| 2209   | bovGMC | Dry <sub>G</sub>               | SF <sub>6</sub>                       | Stomach Pump  | 19.6                                 |
| 3082   | bovGMC | Dry <sub>G</sub>               | SF <sub>6</sub>                       | Stomach Pump  | 20.77                                |
| 4522   | bovGMC | Dry <sub>G</sub>               | SF <sub>6</sub>                       | Stomach Pump  | 20.74                                |
| 5592   | bovGMC | Dry <sub>G</sub>               | SF <sub>6</sub>                       | Stomach Pump  | 20.53                                |
| 5630   | bovGMC | Dry <sub>G</sub>               | SF <sub>6</sub>                       | Stomach Pump  | 19.5                                 |
| 5660   | bovGMC | Dry <sub>G</sub>               | SF <sub>6</sub>                       | Stomach Pump  | 18.46                                |
| 6823   | bovGMC | Dry <sub>G</sub>               | SF <sub>6</sub>                       | Stomach Pump  | 21.47                                |
| 1912   | bovGMC | Wet <sub>G</sub>               | SF <sub>6</sub>                       | Stomach Pump  | 24.29                                |
| 2032   | bovGMC | Wet <sub>G</sub>               | SF <sub>6</sub>                       | Stomach Pump  | 22.4                                 |
| 2074   | bovGMC | Wet <sub>G</sub>               | SF <sub>6</sub>                       | Stomach Pump  | 21.53                                |
| 2141   | bovGMC | Wet <sub>G</sub>               | SF <sub>6</sub>                       | Stomach Pump  | 19.71                                |
| 3097   | bovGMC | Wet <sub>G</sub>               | SF <sub>6</sub>                       | Stomach Pump  | 19.33                                |
| 4567   | bovGMC | Wet <sub>G</sub>               | SF <sub>6</sub>                       | Stomach Pump  | 19.28                                |
| 6747   | bovGMC | Wet <sub>G</sub>               | SF <sub>6</sub>                       | Stomach Pump  | 20.53                                |
| 6810   | bovGMC | Wet <sub>G</sub>               | SF <sub>6</sub>                       | Stomach Pump  | 21.38                                |
| 6853   | bovGMC | Wet <sub>G</sub>               | SF <sub>6</sub>                       | Stomach Pump  | 21.43                                |
| 7354   | bovGMC | Wet <sub>G</sub>               | SF <sub>6</sub>                       | Stomach Pump  | 21.98                                |
| 1831   | bovFCE | FCE                            | Chamber                               | Stomach Pump  | 22.87, 20.72                         |
| 2287   | bovFCE | FCE                            | Chamber                               | Stomach Pump  | 26.26, 22.56                         |
| 3170   | bovFCE | FCE                            | Chamber                               | Stomach Pump  | 21.62, 20.68                         |
| 3219   | bovFCE | FCE                            | Chamber                               | Stomach Pump  | 23.56, 25.58                         |
| 441    | bovFCE | FCE                            | Chamber                               | Stomach Pump  | 19.45, 24.98                         |
| 462    | bovFCE | FCE                            | Chamber                               | Stomach Pump  | 20.15, 22.45                         |
| 463    | bovFCE | FCE                            | Chamber                               | Stomach Pump  | 19.94, 25.81                         |
| 809    | bovFCE | FCE                            | Chamber                               | Stomach Pump  | 20.48, 23.85                         |
| 818    | bovFCE | FCE                            | Chamber                               | Stomach Pump  | 19.36, 20.68                         |
| 820    | bovFCE | FCE                            | Chamber                               | Stomach Pump  | 24.37, 23.43                         |
| 822    | bovFCE | FCE                            | Chamber                               | Stomach Pump  | 25.23, 24.42                         |
| 826    | bovFCE | FCE                            | Chamber                               | Stomach Pump  | 21.97, 22.51                         |
| 841    | bovFCE | FCE                            | Chamber                               | Stomach Pump  | 23.51, 26.27                         |
| 8421   | bovFCE | FCE                            | Chamber                               | Stomach Pump  | 21.79, 20.78                         |
| 8429   | bovFCE | FCE                            | Chamber                               | Stomach Pump  | 22.56, 24.67                         |
| 8466   | bovFCE | FCE                            | Chamber                               | Stomach Pump  | 26.18, 30.94                         |

<sup>†</sup> Where multiple methane measurements are available, both are reported separated by a comma

Con<sub>FT</sub> - Control diet for the bovFT experiment

FT - Treatment diet of the bovFT experiment

Con<sub>G</sub> - Control diet for the bovGMC experiment

Dry<sub>G</sub> - Treatment diet of the bovGMC experiment – Dry supplement

Wet<sub>G</sub> - Treatment diet of the bovGMC experiment – Wet supplement

RF - Rumen fluid

FCE - Diet of the bovFCE animals from a larger study of feed conversion efficiency

SF<sub>6</sub> - A tracer gas technique for methane measurement

Chamber - A respiration chamber was used to measure methane production over 2 days

Table S2. Rumen sequence characteristics and data availability. All trimmed rumen data can be downloaded from the MG-RAST servers at <ftp://ftp.metagenomics.anl.gov/projects/4126/< MG-RAST identifier >/raw> . For example, the read one sequence of 2202's control diet sample can be accessed at <ftp://ftp.metagenomics.anl.gov/projects/4126/4525950.3/raw> . The static link to each metagenome is <http://metagenomics.anl.gov/linkin.cgi?metagenome=< MG-RAST identifier >> ; for example <http://metagenomics.anl.gov/linkin.cgi?metagenome=4525950.3>

| Cow ID <sup>^</sup> | Group <sup>^</sup> | Diet <sup>^</sup>              | Read Pairs <sup>*</sup> | Read 1 MG-RAST identifier | Read 2 MG-RAST identifier |
|---------------------|--------------------|--------------------------------|-------------------------|---------------------------|---------------------------|
| 2202                | bovFT              | Con <sub>FT</sub> <sup>#</sup> | 5 139 308               | 4525950.3                 | 4525951.3                 |
| 2202                | bovFT              | FT                             | 6 390 148               | 4525948.3                 | 4525949.3                 |
| 3063                | bovFT              | FT                             | 6 051 276               | 4525954.3                 | 4525955.3                 |
| 3063                | bovFT              | Con <sub>FT</sub> <sup>#</sup> | 5 938 570               | 4525952.3                 | 4525953.3                 |
| 6803                | bovFT              | FT                             | 5 739 286               | 4519888.3                 | 4519889.3                 |
| 6803                | bovFT              | Con <sub>FT</sub> <sup>#</sup> | 5 900 689               | 4519873.3                 | 4519874.3                 |
| 6838                | bovFT              | FT                             | 6 121 980               | 4519894.3                 | 4519895.3                 |
| 6852                | bovFT              | Con <sub>FT</sub> <sup>#</sup> | 5 829 005               | 4520059.3                 | 4520060.3                 |
| 6852                | bovFT              | FT                             | 4 832 105               | 4519897.3                 | 4519898.3                 |
| 6859                | bovFT              | Con <sub>FT</sub> <sup>#</sup> | 5 838 894               | 4520065.3                 | 4520066.3                 |
| 6859                | bovFT              | FT                             | 5 245 035               | 4520069.3                 | 4520070.3                 |
| 6882                | bovFT              | Con <sub>FT</sub> <sup>#</sup> | 6 076 296               | 4520073.3                 | 4520074.3                 |
| 6882                | bovFT              | FT <sub>a</sub>                | 5 832 342               | 4520077.3                 | 4520078.3                 |
| 6882                | bovFT              | FT <sub>b</sub>                | 4 870 694               | 4520079.3                 | 4520080.3                 |
| 7920                | bovFT              | Con <sub>FT</sub> <sup>#</sup> | 3 973 810               | 4520083.3                 | 4520084.3                 |
| 7920                | bovFT              | FT                             | 6 044 055               | 4520087.3                 | 4520088.3                 |
| 1995                | bovGMC             | Con <sub>G</sub>               | 8 570 618               | 4525790.3                 | 4525791.3                 |
| 2028                | bovGMC             | Con <sub>G</sub>               | 9 530 428               | 4525792.3                 | 4525793.3                 |
| 2165                | bovGMC             | Con <sub>G</sub>               | 6 994 291               | 4525796.3                 | 4525797.3                 |
| 3060                | bovGMC             | Con <sub>G</sub>               | 10 199 248              | 4525798.3                 | 4525956.3                 |
| 4570                | bovGMC             | Con <sub>G</sub>               | 13 438 217              | 4525957.3                 | 4525799.3                 |
| 5679                | bovGMC             | Con <sub>G</sub>               | 5 385 519               | 4525958.3                 | 4525800.3                 |
| 657                 | bovGMC             | Con <sub>G</sub>               | 5 411 824               | 4525801.3                 | 4525802.3                 |
| 6833                | bovGMC             | Con <sub>G</sub>               | 7 192 530               | 4525803.3                 | 4525804.3                 |
| 6857                | bovGMC             | Con <sub>G</sub>               | 5 537 990               | 4525805.3                 | 4525806.3                 |
| 6870                | bovGMC             | Con <sub>G</sub>               | 10 111 427              | 4525807.3                 | 4525808.3                 |
| 7939                | bovGMC             | Con <sub>G</sub>               | 6 459 344               | 4525809.3                 | 4525810.3                 |
| 1990                | bovGMC             | Dry <sub>G</sub>               | 7 069 477               | 4525811.3                 | 4525812.3                 |
| 2196                | bovGMC             | Dry <sub>G</sub>               | 5 691 296               | 4525813.3                 | 4525814.3                 |
| 2204                | bovGMC             | Dry <sub>G</sub>               | 6 726 286               | 4525815.3                 | 4525816.3                 |
| 2209                | bovGMC             | Dry <sub>G</sub>               | 4 246 828               | 4525817.3                 | 4525818.3                 |
| 3082                | bovGMC             | Dry <sub>G</sub>               | 6 083 539               | 4525819.3                 | 4525820.3                 |
| 4522                | bovGMC             | Dry <sub>G</sub>               | 7 190 784               | 4525821.3                 | 4525822.3                 |
| 5592                | bovGMC             | Dry <sub>G</sub>               | 4 721 060               | 4525823.3                 | 4525824.3                 |
| 5630                | bovGMC             | Dry <sub>G</sub>               | 6 632 937               | 4525825.3                 | 4525826.3                 |
| 5660                | bovGMC             | Dry <sub>G</sub>               | 7 101 599               | 4525827.3                 | 4525828.3                 |
| 6823                | bovGMC             | Dry <sub>G</sub>               | 10 873 783              | 4525829.3                 | 4525830.3                 |
| 1912                | bovGMC             | Wet <sub>G</sub>               | 6 360 807               | 4525831.3                 | 4525832.3                 |
| 2032                | bovGMC             | Wet <sub>G</sub>               | 6 490 865               | 4525833.3                 | 4525834.3                 |
| 2074                | bovGMC             | Wet <sub>G</sub>               | 4 539 275               | 4525835.3                 | 4525836.3                 |
| 2141                | bovGMC             | Wet <sub>G</sub>               | 6 928 120               | 4525837.3                 | 4525838.3                 |
| 3097                | bovGMC             | Wet <sub>G</sub>               | 4 129 699               | 4525839.3                 | 4525840.3                 |
| 4567                | bovGMC             | Wet <sub>G</sub>               | 7 145 390               | 4525841.3                 | 4525842.3                 |
| 6747                | bovGMC             | Wet <sub>G</sub>               | 6 978 648               | 4525843.3                 | 4525844.3                 |
| 6810                | bovGMC             | Wet <sub>G</sub>               | 6 148 444               | 4525845.3                 | 4525846.3                 |
| 6853                | bovGMC             | Wet <sub>G</sub>               | 4 829 180               | 4525847.3                 | 4525848.3                 |
| 7354                | bovGMC             | Wet <sub>G</sub>               | 6 306 769               | 4525849.3                 | 4525850.3                 |
| 1831                | bovFCE             | FCE                            | 8 062 738               | 4520089.3                 | 4520090.3                 |
| 2287                | bovFCE             | FCE                            | 7 575 718               | 4520091.3                 | 4520092.3                 |
| 3170                | bovFCE             | FCE                            | 8 605 526               | 4520093.3                 | 4520094.3                 |
| 3219                | bovFCE             | FCE                            | 7 578 072               | 4520095.3                 | 4520096.3                 |
| 441                 | bovFCE             | FCE                            | 7 552 686               | 4520097.3                 | 4520098.3                 |
| 462                 | bovFCE             | FCE                            | 7 494 868               | 4520099.3                 | 4520100.3                 |
| 463                 | bovFCE             | FCE                            | 8 640 546               | 4520101.3                 | 4520102.3                 |
| 809                 | bovFCE             | FCE                            | 6 785 504               | 4520103.3                 | 4520104.3                 |
| 818                 | bovFCE             | FCE                            | 6 631 726               | 4520105.3                 | 4520106.3                 |
| 820                 | bovFCE             | FCE                            | 10 342 670              | 4520132.3                 | 4520133.3                 |
| 822                 | bovFCE             | FCE                            | 7 239 168               | 4520134.3                 | 4520135.3                 |
| 826                 | bovFCE             | FCE                            | 7 598 502               | 4520136.3                 | 4520137.3                 |
| 841                 | bovFCE             | FCE                            | 7 523 090               | 4520138.3                 | 4520139.3                 |
| 8421                | bovFCE             | FCE                            | 7 100 976               | 4520140.3                 | 4520141.3                 |
| 8429                | bovFCE             | FCE                            | 7 724 344               | 4520142.3                 | 4520143.3                 |
| 8466                | bovFCE             | FCE                            | 7 234 222               | 4520144.3                 | 4520145.3                 |

<sup>\*</sup> Number of read pairs remaining after trimming (removal of poor quality sequence)

<sup>#</sup> These sequence sets are published in Ross et al 2012

<sup>^</sup> See Table S1 for definitions

Table S3. Percentage of reads that aligned to the bovine or human metagenome database for each sample.

| Sample<br>(Diet – CowID) | % aligning | Human sample | % aligning | Human sample | % aligning |
|--------------------------|------------|--------------|------------|--------------|------------|
| Con <sub>G</sub> -1995   | 9.76       | MH0001       | 87.50      | MH0063       | 61.70      |
| Con <sub>G</sub> -2028   | 9.99       | MH0002       | 78.87      | MH0064       | 82.76      |
| Con <sub>G</sub> -2042   | 7.76       | MH0003       | 73.84      | MH0065       | 54.60      |
| Con <sub>G</sub> -2165   | 8.45       | MH0004       | 58.68      | MH0066       | 70.10      |
| Con <sub>G</sub> -3060   | 9.63       | MH0005       | 77.19      | MH0067       | 85.63      |
| Con <sub>G</sub> -4570   | 9.31       | MH0006       | 72.94      | MH0068       | 88.31      |
| Con <sub>G</sub> -5679   | 8.75       | MH0007       | 80.85      | MH0069       | 70.78      |
| Con <sub>G</sub> -657    | 8.68       | MH0008       | 81.22      | MH0070       | 70.36      |
| Con <sub>G</sub> -6833   | 8.81       | MH0009       | 52.85      | MH0071       | 66.64      |
| Con <sub>G</sub> -6857   | 9.24       | MH0010       | 90.96      | MH0073       | 84.98      |
| Con <sub>G</sub> -6870   | 9.95       | MH0011       | 50.72      | MH0074       | 82.09      |
| Con <sub>G</sub> -7939   | 8.62       | MH0012       | 53.46      | MH0075       | 78.33      |
| Dry <sub>G</sub> -1990   | 8.03       | MH0013       | 73.01      | MH0076       | 70.26      |
| Dry <sub>G</sub> -2196   | 8.97       | MH0014       | 80.96      | MH0077       | 66.56      |
| Dry <sub>G</sub> -2204   | 7.33       | MH0015       | 82.90      | MH0078       | 64.51      |
| Dry <sub>G</sub> -2209   | 8.65       | MH0016       | 78.50      | MH0079       | 45.44      |
| Dry <sub>G</sub> -3082   | 8.26       | MH0017       | 69.41      | MH0080       | 84.65      |
| Dry <sub>G</sub> -4522   | 9.11       | MH0018       | 82.89      | MH0081       | 77.76      |
| Dry <sub>G</sub> -5592   | 7.65       | MH0019       | 88.49      | MH0082       | 70.91      |
| Dry <sub>G</sub> -5630   | 8.54       | MH0020       | 85.54      | MH0083       | 78.03      |
| Dry <sub>G</sub> -5660   | 8.09       | MH0021       | 76.58      | MH0084       | 82.80      |
| Dry <sub>G</sub> -6823   | 7.18       | MH0022       | 53.76      | MH0085       | 86.55      |
| Wet <sub>G</sub> -1912   | 7.28       | MH0023       | 78.09      | MH0086       | 75.69      |
| Wet <sub>G</sub> -2032   | 7.92       | MH0024       | 70.55      | O2.UC.11     | 75.61      |
| Wet <sub>G</sub> -2074   | 7.35       | MH0025       | 63.40      | O2.UC.12     | 61.35      |
| Wet <sub>G</sub> -2141   | 7.71       | MH0026       | 78.88      | O2.UC.13     | 69.72      |
| Wet <sub>G</sub> -3097   | 8.59       | MH0027       | 84.25      | O2.UC.14     | 75.33      |
| Wet <sub>G</sub> -4567   | 8.43       | MH0028       | 80.13      | O2.UC.16     | 59.66      |
| Wet <sub>G</sub> -6747   | 7.87       | MH0030       | 59.88      | O2.UC.17     | 83.25      |
| Wet <sub>G</sub> -6810   | 8.30       | MH0031       | 48.02      | O2.UC.18     | 81.76      |
| Wet <sub>G</sub> -6853   | 7.73       | MH0032       | 79.11      | O2.UC.19     | 76.85      |
| Wet <sub>G</sub> -7354   | 6.26       | MH0033       | 78.31      | O2.UC.1      | 71.78      |
| FCE -1831                | 4.71       | MH0034       | 83.49      | O2.UC.20     | 82.74      |
| FCE -2287                | 2.90       | MH0035       | 70.11      | O2.UC.21     | 91.79      |
| FCE -3170                | 1.94       | MH0036       | 71.41      | O2.UC.22     | 85.74      |
| FCE -3219                | 3.46       | MH0037       | 74.11      | O2.UC.23     | 74.80      |
| FCE -441                 | 4.16       | MH0038       | 73.73      | O2.UC.24     | 64.56      |
| FCE -462                 | 6.50       | MH0039       | 85.36      | O2.UC.4      | 76.59      |
| FCE -463                 | 4.93       | MH0040       | 67.34      | V1.CD.12     | 89.02      |
| FCE -809                 | 5.42       | MH0041       | 82.96      | V1.CD.13     | 71.61      |
| FCE -818                 | 5.05       | MH0042       | 53.74      | V1.CD.14     | 80.45      |
| FCE -820                 | 6.27       | MH0043       | 77.60      | V1.CD.15     | 87.28      |
| FCE -822                 | 4.61       | MH0044       | 79.26      | V1.CD.1      | 92.44      |
| FCE -826                 | 8.29       | MH0045       | 80.05      | V1.CD.2      | 75.45      |
| FCE -841                 | 3.40       | MH0046       | 60.51      | V1.CD.3      | 58.44      |
| FCE -8421                | 5.95       | MH0047       | 34.79      | V1.CD.4      | 82.21      |
| FCE -8429                | 4.12       | MH0048       | 76.29      | V1.CD.6      | 88.05      |
| FT -2202                 | 6.77       | MH0049       | 79.44      | V1.CD.8      | 74.99      |
| Con <sub>FT</sub> -2202  | 6.06       | MH0050       | 65.35      | V1.CD.9      | 77.36      |
| FT -3063                 | 6.78       | MH0051       | 72.99      | V1.UC.10     | 73.76      |
| Con <sub>FT</sub> -3063  | 5.15       | MH0052       | 54.10      | V1.UC.13     | 69.87      |
| FT -6803                 | 5.02       | MH0053       | 50.82      | V1.UC.14     | 67.62      |
| Con <sub>FT</sub> -6803  | 5.63       | MH0054       | 67.12      | V1.UC.15     | 76.03      |
| FT -6838                 | 6.91       | MH0055       | 57.88      | V1.UC.17     | 67.89      |
| FT -6852                 | 5.98       | MH0056       | 70.94      | V1.UC.18     | 78.70      |
| Con <sub>FT</sub> -6852  | 7.79       | MH0057       | 51.62      | V1.UC.19     | 77.98      |
| FT -6859                 | 7.08       | MH0058       | 80.95      | V1.UC.21     | 80.31      |
| Con <sub>FT</sub> -6859  | 5.63       | MH0059       | 74.96      | V1.UC.6      | 79.05      |
| FT -6882 <sub>a</sub>    | 3.91       | MH0060       | 51.62      | V1.UC.7      | 85.26      |
| FT -6882 <sub>b</sub>    | 5.11       | MH0061       | 86.70      | V1.UC.8      | 80.85      |
| Con <sub>FT</sub> -6882  | 4.53       | MH0062       | 76.98      | V1.UC.9      | 78.94      |
| FT -7920                 | 5.58       |              |            |              |            |
| Con <sub>FT</sub> -7920  | 8.58       |              |            |              |            |

Con<sub>FT</sub> - Control diet for the bovFT experiment

FT - Treatment diet of the bovFT experiment

Con<sub>G</sub> - Control diet for the bovGMC experimentDry<sub>G</sub> - Treatment diet of the bovGMC experiment – Dry supplementWet<sub>G</sub> - Treatment diet of the bovGMC experiment – Wet supplement

FCE - Diet of the bovFCE animals from a larger study of feed conversion efficiency

## a) An example metagenomic profile matrix

```

Grapemarc-Con-3060 33 49 4 14 4 37 2 28 31 78 28 8 24 321
Grapemarc-Con-5679 37 80 3 1 4 46 2 46 41 140 55 6 38 176
Grapemarc-Con-6870 50 49 3 4 0 41 2 48 46 91 284 2 20 77
Grapemarc-Dry-1990 49 59 4 2 2 53 6 50 22 74 44 4 28 247
Grapemarc-Dry-3082 32 50 2 5 10 56 11 38 11 76 74 4 4 230
Grapemarc-Dry-5592 52 79 3 3 6 94 0 76 46 132 84 4 32 372
Grapemarc-Wet-1912 29 68 0 4 4 58 0 48 34 109 34 0 14 272
Grapemarc-Wet-2074 40 49 4 4 6 81 2 83 26 85 62 4 36 515
Grapemarc-Wet-6747 26 68 7 2 7 57 10 49 44 94 40 4 15 130
Grapemarc-Wet-6853 24 44 2 6 8 63 0 59 25 128 76 4 20 190
6803-control-rumen 35 57 0 0 0 160 2 95 37 224 18 0 31 146
6859-control-rumen 42 69 2 2 2 114 4 83 30 217 70 0 50 192
3063-FT-rumen 19 42 0 4 0 121 0 108 38 197 109 0 9 89
6838-FT-rumen 37 77 0 2 0 229 0 241 38 207 4 0 36 108
7920-FT-rumen 35 31 0 0 2 89 4 74 24 209 79 2 28 113
FCE-2287 4 22 6 10 16 8 12 8 8 87 56 6 4 8
FCE-462 4 21 34 40 25 9 52 8 12 55 56 45 4 30
FCE-809 9 38 44 51 58 16 56 20 16 93 30 39 8 34
FCE-826 6 8 54 65 90 10 67 0 8 32 12 51 4 40
FCE-8421 6 22 40 63 75 17 44 18 0 67 24 56 8 29

```

## b) An example phenotype file

```

Grapemarc-Con-3060 0.6403346
Grapemarc-Con-5679 1.741141
Grapemarc-Con-6870 0.439536
Grapemarc-Dry-1990 -0.3529012
Grapemarc-Dry-3082 -0.6074851
Grapemarc-Dry-5592 -0.6935416
Grapemarc-Wet-1912 0.6546774
Grapemarc-Wet-2074 -0.3349727
Grapemarc-Wet-6747 -0.6935416
Grapemarc-Wet-6853 -0.3708296

```

## c) An example output file from rrBLUP based predictions

```

6803-control-rumen 3.62880808782934e-09
6859-control-rumen 4.39322176464028e-10
3063-FT-rumen 3.03241348974004e-09
6838-FT-rumen 3.22750950791945e-09
7920-FT-rumen 1.07344093845841e-09
FCE-2287 -1.70532194468503e-09
FCE-462 -2.84758459821551e-09
FCE-809 -3.09477993937246e-09
FCE-826 -3.00581497279512e-09
FCE-8421 -3.82382100268925e-09

```

## d) An example .as file generated by the ASReml script

```

MetagenomicPredictions
name !ALPHA 10 !LL 19
phenotype
id 10
MPM.txt.giv
Phenotypes.txt.phen !AISING
phenotype ~ mu !r giv(id,1)

```

Figure S1. Examples of metagenomic prediction files. Both input files are space delimited and the names in the phenotype file match the names in the profile matrix exactly. a) metagenome profile matrix which contains counts of the number of reads which align to each contig from each sample, b) the phenotypes of the reference population which will be used to predict the unknown samples. All samples in the phenotype file should be in the metagenome profile matrix; but not all samples in the metagenome profile matrix need be in the phenotype file (i.e. the validation animals are left out of the phenotype file) c) example of phenotypes predicted by the rrBLUP method, the file which these values are written to is determined by the third variable given to the script, d) example of the .as file that is generated from the ASReml method. This file and the others generated is then used to run ASReml.

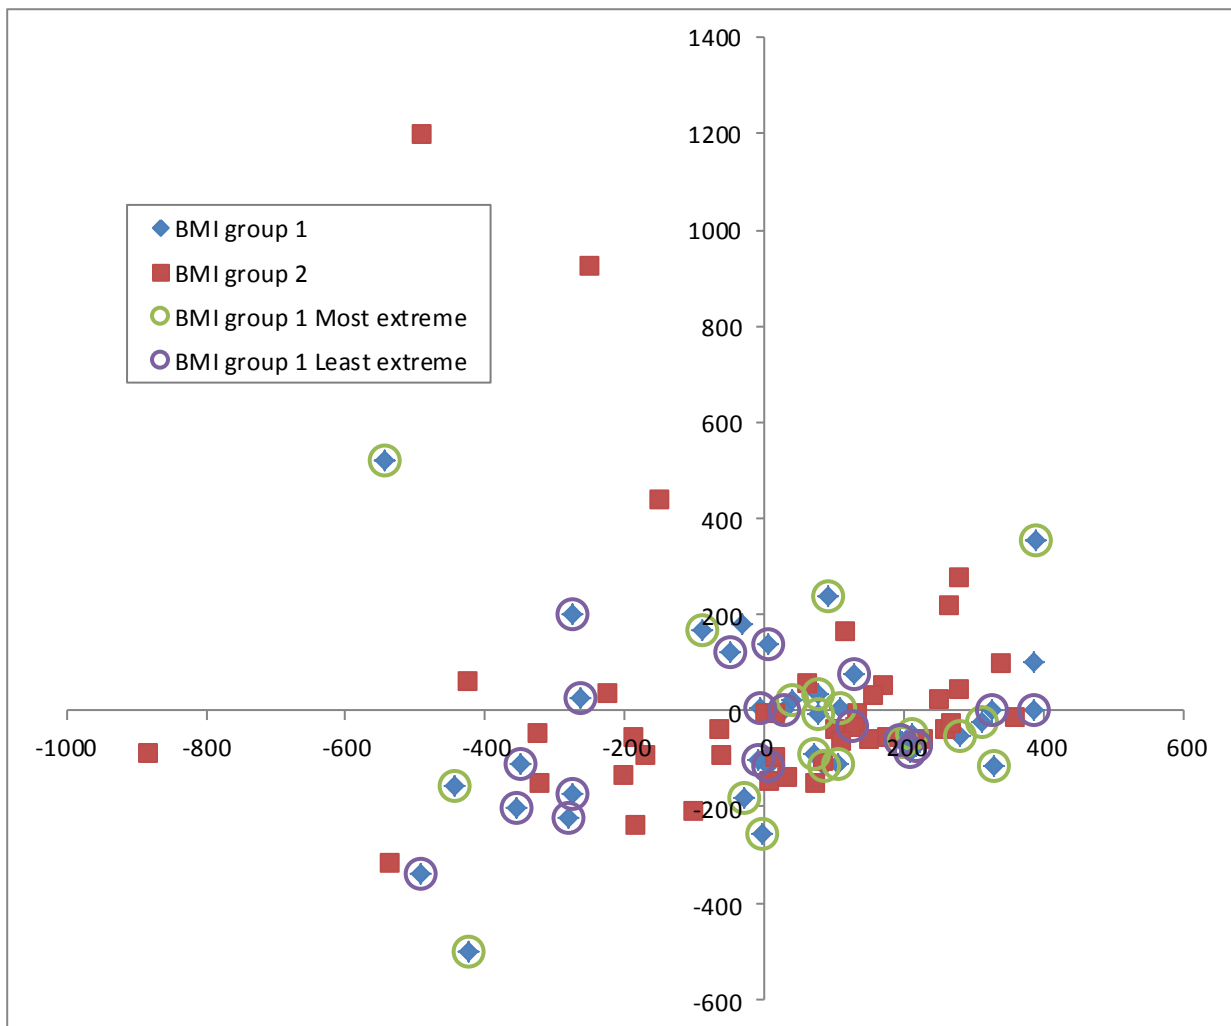

Figure S2. A principle component plot of the human BMI datasets. Principle component 1 is shown on the x axis, principle component 2 is shown on the y axis. Different subsets used for validation are indicated by different symbols. The most and least extreme phenotypes of the BMI group 1 dataset are circled.



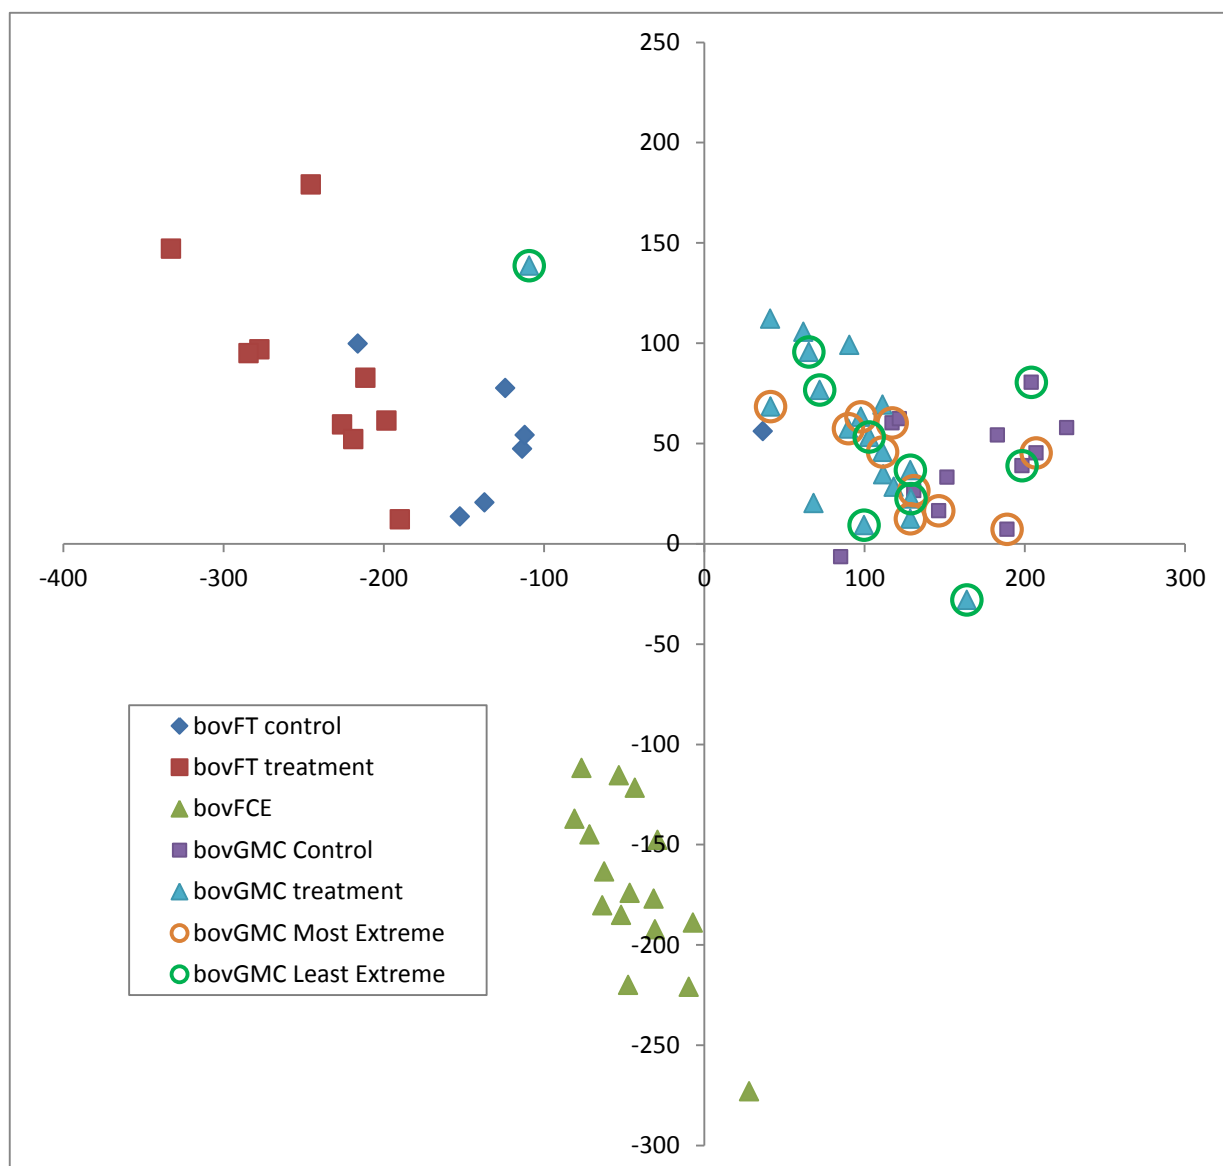

Figure S3. A principle component plot of the bovine rumen datasets. Principle component 1 is shown on the x axis, principle component 2 is shown on the y axis. Different subsets used for validation are indicated by different symbols. The most and least extreme phenotypes of the bovGMC dataset are circled.

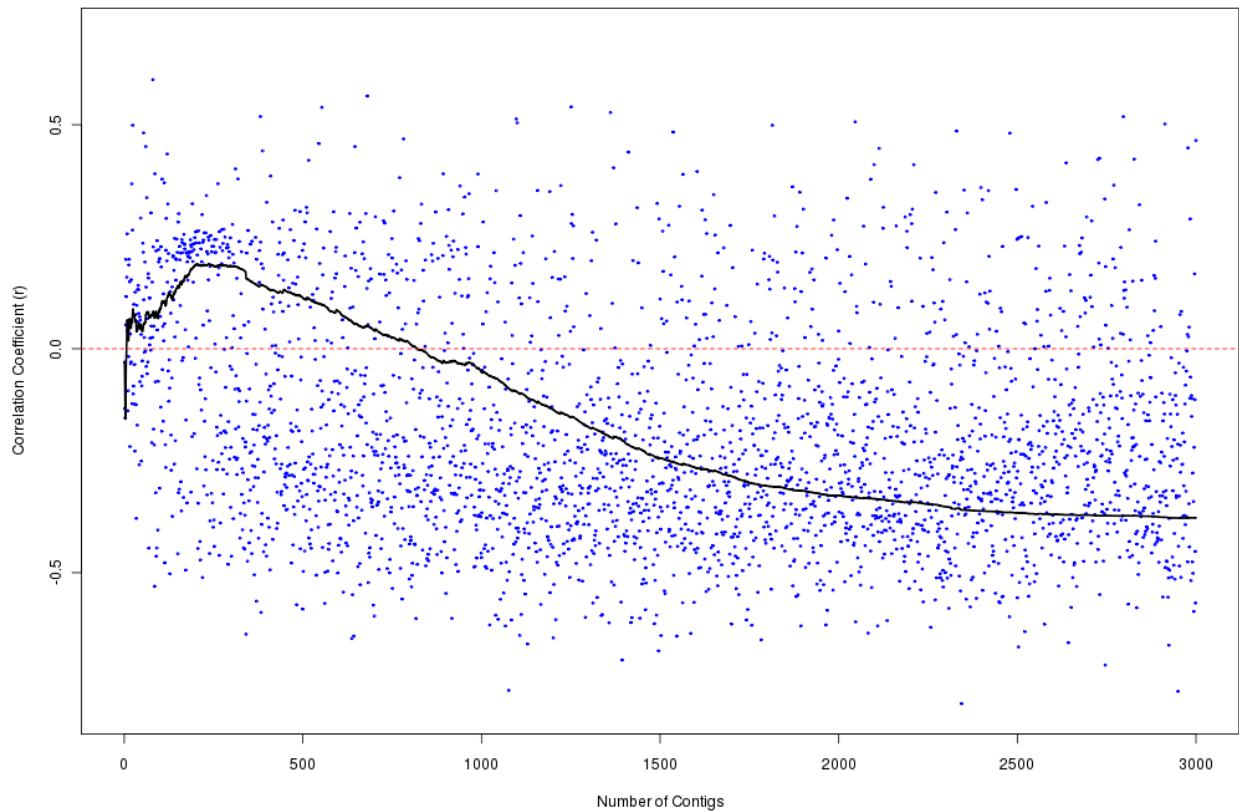

Figure S4. Prediction by contig. Correlations between predicted and measured methane production. The X axis is contigs ordered from most significant to least significant from a linear model (methane  $\sim$  contig abundance), with metagenomic profiles from both bovFT and bovGMC used in the model. The resulting equation was then applied to the bovFCE dataset to predict methane production. The Blue dots indicate the correlation coefficient between predicted methane using that one contig, and actual methane. The black line is the sum of the predictions from the x most significant contigs. Predictions have an average negative correlation with real methane production. This may be an artefact of the methane mitigating diet effects.

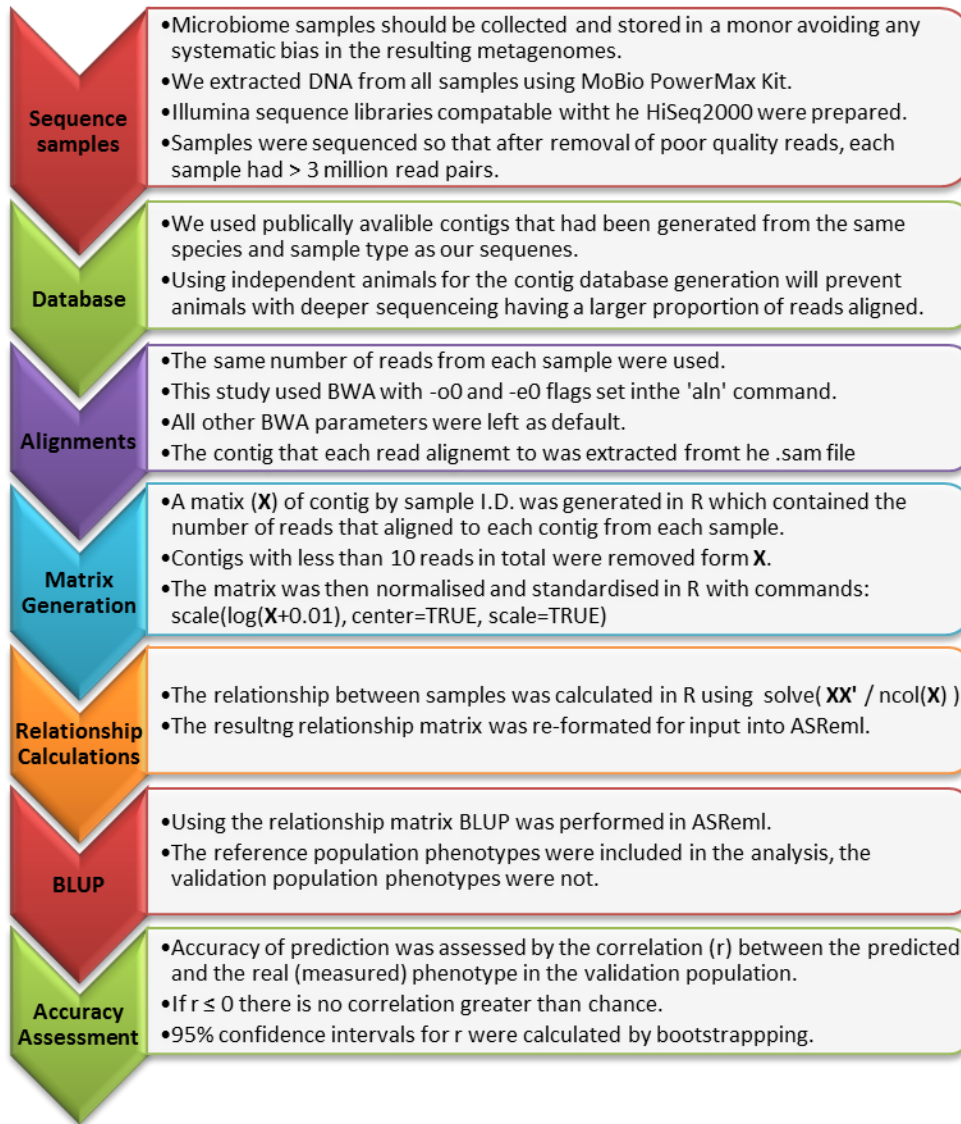

Figure S5. Basic methodological procedure of performing metagenomic predictions. R refers to the R statistical language [3]. BWA is a short read alignment program [9].

## References

1. Gilmour AR, Gogel BJ, Cullis BR, Thompson R (2006) ASReml User Guide Release 2.0. VSN International Ltd, Hemel Hempstead, HP1 1ES, UK.
2. Endelman JB (2011) Ridge regression and other kernels for genomic selection with R package rrBLUP. *The Plant Genome* 4: 250-255.
3. R Development Core Team (2011) R: A Language and Environment for Statistical Computing. Vienna, Austria: R Foundation for Statistical Computing.
4. Tan ND, Wanapat M, Uriyapongson S, Cherdthong A, Pilajun R (2012) Enhancing Mulberry Leaf Meal with Urea by Pelleting to Improve Rumen Fermentation in Cattle. *Asian Australasian Journal of Animal Science* 25: 452-461
5. Park K, Jang J, Irimia D, Sturgis J, Lee J, et al. (2008) 'Living cantilever arrays' for characterization of mass of single live cells in fluids. *Lab Chip* 8: 1034-1041.
6. Janloo S, Dolezal H, Strasia C, Clarkson W, Owens F, et al. (1998) Impact of withholding feed on weight and composition of ruminal contents. Stillwater, OK: Oklahoma State University. Available at <http://www.ansi.okstate.edu/research> p.
7. Craig WM, Broderick GA, Ricker DB (1987) Quantitation of Microorganisms Associated with the Particulate Phase of Ruminant Ingesta. *The Journal of Nutrition* 117: 56-62.
8. Savage DC (1977) Microbial ecology of the gastrointestinal tract. *Annual Review of Microbiology* 31: 107-133.
9. Li H, Durbin R (2009) Fast and accurate short read alignment with Burrows–Wheeler transform. *Bioinformatics* 25: 1754-1760.
